## Correction

# Correction: Optimal Scaling of Digital Transcriptomes

The *PLOS ONE* Staff

## Notice of Republication

This article was republished on February 28, 2014, to replace an incorrectly published version. The new version includes all figures in the correct order and addresses the figure issues noted in the previous Formal Correction. The originally published, uncorrected article and the republished, corrected article are provided here for reference.

## Supporting Information

### File S1.

Originally published, uncorrected article.  
(PDF)

### File S2.

Republished, corrected article.  
(PDF)

## Reference

1. Glusman G, Caballero J, Robinson M, Kutlu B, Hood L (2013) Optimal Scaling of Digital Transcriptomes. *PLoS ONE* 8(11): e77885. doi:10.1371/journal.pone.0077885

---

**Citation:** The *PLOS ONE* Staff (2014) Correction: Optimal Scaling of Digital Transcriptomes. *PLoS ONE* 9(3): e93244. doi:10.1371/journal.pone.0093244

**Published:** March 18, 2014

**Copyright:** © 2014 The *PLOS ONE* Staff. This is an open-access article distributed under the terms of the Creative Commons Attribution License, which permits unrestricted use, distribution, and reproduction in any medium, provided the original author and source are credited.
